# Supplementary material for: Kinetic studies on the reactions of [Pd(dach)(X–Y)] complexes with some DNA constituents
Source: Royal Society of Chemistry journal article supplement (doi:10.1039/b714329j), 2007-12-10
Supplement: b714329j.pdf [file b714329j.pdf]

## Supporting Information

### Kinetic studies on the reactions of [Pd(dach)(X-Y)] complexes with some DNA constituents

Biljana Petrović, Živadin D. Bugarčić\* and Rudi van Eldik\*

**Table S1** Observed *pseudo*-first order rate constants as a function of ligand concentration for the reaction between [Pd(dach)(H<sub>2</sub>O)<sub>2</sub>]<sup>2+</sup> and inosine in 0.10 M NaClO<sub>4</sub>, pH = 2.5, λ = 325 nm.

|             | T/K   | 10 <sup>-3</sup> C <sub>Ino</sub> /M | k <sub>obsd</sub> /s <sup>-1</sup> |
|-------------|-------|--------------------------------------|------------------------------------|
| First step  | 298.1 | 1.5                                  | 2.96(9)                            |
|             |       | 2.0                                  | 4.47(8)                            |
|             |       | 3.0                                  | 11.5(9)                            |
|             |       | 4.0                                  | 8.22(7)                            |
|             |       | 5.0                                  | 10.1(8)                            |
| Second step | 298.1 | 1.5                                  | 0.119(9)                           |
|             |       | 2.0                                  | 0.129(8)                           |
|             |       | 3.0                                  | 0.149(8)                           |
|             |       | 4.0                                  | 0.162(7)                           |
|             |       | 5.0                                  | 0.188(7)                           |

**Table S2** Observed *pseudo*-first order rate constants as a function of ligand concentration for the reaction between  $[\text{Pd}(\text{dach})(\text{H}_2\text{O})_2]^{2+}$  and 5'-IMP in 0.10 M  $\text{NaClO}_4$ ,  $\text{pH} = 2.5$ ,  $\lambda = 330$  nm.

|             | T/K   | $10^{-3} C_{5'\text{-IMP}}/\text{M}$ | $k_{\text{obsd}}/\text{s}^{-1}$ |
|-------------|-------|--------------------------------------|---------------------------------|
| First step  | 298.3 | 1.0                                  | 1.10(9)                         |
|             |       | 1.5                                  | 1.52(7)                         |
|             |       | 2.0                                  | 2.00(8)                         |
|             |       | 3.0                                  | 2.77(8)                         |
|             |       | 4.0                                  | 3.49(7)                         |
|             |       | 5.0                                  | 4.52(8)                         |
| Second step | 298.3 | 1.5                                  | 0.073(7)                        |
|             |       | 2.0                                  | 0.085(7)                        |
|             |       | 3.0                                  | 0.095(7)                        |
|             |       | 4.0                                  | 0.109(6)                        |
|             |       | 5.0                                  | 0.127(7)                        |

**Table S3** Observed *pseudo*-first order rate constants as a function of ligand concentration for the reaction between  $[\text{Pd}(\text{dach})(\text{H}_2\text{O})_2]^{2+}$  and 5'-GMP in 0.10 M  $\text{NaClO}_4$ ,  $\text{pH} = 2.5$ ,  $\lambda = 320$  nm.

|             | T/K   | $10^{-3} C_{5'\text{-GMP}}/\text{M}$ | $k_{\text{obsd}}/\text{s}^{-1}$ |
|-------------|-------|--------------------------------------|---------------------------------|
| First step  | 298.2 | 1.0                                  | 1.13(9)                         |
|             |       | 1.5                                  | 1.55(8)                         |
|             |       | 2.0                                  | 2.04(7)                         |
|             |       | 3.0                                  | 2.81(7)                         |
|             |       | 4.0                                  | 3.77(8)                         |
|             |       | 5.0                                  | 4.67(8)                         |
| Second step | 298.2 | 1.5                                  | 0.124(8)                        |
|             |       | 2.0                                  | 0.138(7)                        |
|             |       | 3.0                                  | 0.156(7)                        |
|             |       | 4.0                                  | 0.170(8)                        |
|             |       | 5.0                                  | 0.178(7)                        |

**Table S4** Observed *pseudo*-first order rate constants as a function of ligand concentration for the reaction between [Pd(dach)(*O,O*-cbdca)] and inosine in 25 mM Hepes, pH = 7.2,  $\lambda = 305$  nm.

|             | T/K   | $10^{-3} C_{\text{Ino}}/\text{M}$ | $k_{\text{obsd}}/\text{s}^{-1}$ |
|-------------|-------|-----------------------------------|---------------------------------|
| First step  | 297.9 | 1.0                               | 0.72(8)                         |
|             |       | 1.5                               | 0.98(7)                         |
|             |       | 2.0                               | 1.33(7)                         |
|             |       | 3.0                               | 2.01(8)                         |
|             |       | 4.0                               | 2.64(6)                         |
|             |       | 5.0                               | 3.26(8)                         |
| Second step | 297.9 | 1.5                               | 0.064(7)                        |
|             |       | 2.0                               | 0.068(7)                        |
|             |       | 3.0                               | 0.074(7)                        |
|             |       | 4.0                               | 0.085(6)                        |
|             |       | 5.0                               | 0.093(8)                        |

**Table S5** Observed *pseudo*-first order rate constants as a function of ligand concentration for the reaction between [Pd(dach)(*O,O*-cbdca)] and 5'-IMP in 25 mM Hepes, pH = 7.2,  $\lambda = 335$  nm.

|             | T/K   | $10^{-3} C_{5'-IMP}/M$ | $k_{obsd}/s^{-1}$ |
|-------------|-------|------------------------|-------------------|
| First step  | 298.0 | 1.0                    | 0.196(7)          |
|             |       | 1.5                    | 0.245(7)          |
|             |       | 2.0                    | 0.322(8)          |
|             |       | 3.0                    | 0.389(7)          |
|             |       | 4.0                    | 0.488(8)          |
|             |       | 5.0                    | 0.619(9)          |
| Second step | 298.0 | 1.5                    | 0.027(7)          |
|             |       | 2.0                    | 0.031(7)          |
|             |       | 3.0                    | 0.036(7)          |
|             |       | 4.0                    | 0.039(8)          |
|             |       | 5.0                    | 0.044(8)          |

**Table S6** Observed *pseudo*-first order rate constants as a function of ligand concentration for the reaction between [Pd(dach)(*O,O*-cbdca)] and 5'-GMP in 25 mM HEPES, pH = 7.2,  $\lambda = 325$  nm.

|             | T/K   | $10^{-3} C_{5'-GMP}/M$ | $k_{obsd}/s^{-1}$ |
|-------------|-------|------------------------|-------------------|
| First step  | 298.0 | 1.0                    | 0.211(8)          |
|             |       | 1.5                    | 0.313(7)          |
|             |       | 2.0                    | 0.392(7)          |
|             |       | 3.0                    | 0.580(6)          |
|             |       | 4.0                    | 0.727(7)          |
|             |       | 5.0                    | 0.892(7)          |
| Second step | 298.0 | 1.5                    | 0.046(7)          |
|             |       | 2.0                    | 0.051(6)          |
|             |       | 3.0                    | 0.057(6)          |
|             |       | 4.0                    | 0.061(7)          |
|             |       | 5.0                    | 0.066(6)          |

**Table S7** Observed *pseudo*-first order rate constants as a function of ligand concentration for the reaction between [Pd(dach)(*O,O*-ox)] and inosine in 25 mM Hepes, pH = 7.2,  $\lambda = 320$  nm.

|             | T/K   | $10^{-3} C_{\text{Ino}}/\text{M}$ | $k_{\text{obsd}}/\text{s}^{-1}$ |
|-------------|-------|-----------------------------------|---------------------------------|
| First step  | 298.1 | 1.0                               | 1.57(7)                         |
|             |       | 1.5                               | 2.45(6)                         |
|             |       | 2.0                               | 3.38(6)                         |
|             |       | 3.0                               | 4.95(7)                         |
|             |       | 4.0                               | 6.45(8)                         |
|             |       | 5.0                               | 8.13(7)                         |
| Second step | 298.1 | 1.5                               | 0.049(6)                        |
|             |       | 2.0                               | 0.062(6)                        |
|             |       | 3.0                               | 0.082(6)                        |
|             |       | 4.0                               | 0.098(7)                        |
|             |       | 5.0                               | 0.110(7)                        |

**Table S8** Observed *pseudo*-first order rate constants as a function of ligand concentration for the reaction between [Pd(dach)(*O,O*-ox)] and 5'-IMP in 25 mM Hepes, pH = 7.2,  $\lambda = 320$  nm.

|             | T/K   | $10^{-3} C_{5'-IMP}/M$ | $k_{obsd}/s^{-1}$ |
|-------------|-------|------------------------|-------------------|
| First step  | 298.0 | 1.0                    | 0.98(8)           |
|             |       | 1.5                    | 1.55(7)           |
|             |       | 2.0                    | 1.88(7)           |
|             |       | 3.0                    | 2.64(6)           |
|             |       | 4.0                    | 3.34(7)           |
|             |       | 5.0                    | 4.25(6)           |
| Second step | 298.0 | 1.5                    | 0.056(6)          |
|             |       | 2.0                    | 0.062(7)          |
|             |       | 3.0                    | 0.069(6)          |
|             |       | 4.0                    | 0.081(6)          |
|             |       | 5.0                    | 0.092(6)          |



**Table S9** Observed *pseudo*-first order rate constants as a function of ligand concentration for the reaction between [Pd(dach)(*O,O*-ox)] and 5'-GMP in 25 mM Hepes, pH = 7.2,  $\lambda = 325$  nm.

|             | T/K   | $10^{-3} C_{5'-\text{GMP}}/\text{M}$ | $k_{\text{obsd}}/\text{s}^{-1}$ |
|-------------|-------|--------------------------------------|---------------------------------|
| First step  | 298.0 | 1.0                                  | 1.04(7)                         |
|             |       | 1.5                                  | 1.43(7)                         |
|             |       | 2.0                                  | 2.02(6)                         |
|             |       | 3.0                                  | 2.88(8)                         |
|             |       | 4.0                                  | 3.68(6)                         |
|             |       | 5.0                                  | 4.42(9)                         |
| Second step | 298.0 | 1.5                                  | 0.01(7)                         |
|             |       | 2.0                                  | 0.065(6)                        |
|             |       | 3.0                                  | 0.077(7)                        |
|             |       | 4.0                                  | 0.091(6)                        |
|             |       | 5.0                                  | 0.101(8)                        |

**Table S10** Observed *pseudo*-first order rate constants as a function of ligand concentration and temperature for the reaction between  $[\text{Pd}(\text{dach})(N,O\text{-gly})]^+$  and inosine in 25 mM Hepes, pH = 7.2,  $\lambda = 305$  nm.

|             | T/K   | $10^{-3} C_{\text{Ino}}/\text{M}$ | $k_{\text{obsd}}/\text{s}^{-1}$ |
|-------------|-------|-----------------------------------|---------------------------------|
| First step  | 288.3 | 1.0                               | 1.13(8)                         |
|             |       | 1.5                               | 1.78(8)                         |
|             |       | 2.0                               | 2.32(8)                         |
|             |       | 3.0                               | 3.42(7)                         |
|             |       | 4.0                               | 4.45(8)                         |
|             |       | 5.0                               | 5.81(7)                         |
|             | 298.0 | 1.0                               | 1.51(7)                         |
|             |       | 1.5                               | 2.23(8)                         |
|             |       | 2.0                               | 2.89(8)                         |
|             |       | 3.0                               | 4.34(7)                         |
|             |       | 4.0                               | 5.99(8)                         |
|             |       | 5.0                               | 7.24(9)                         |
|             | 308.0 | 1.0                               | 1.95(7)                         |
|             |       | 1.5                               | 2.75(6)                         |
|             |       | 2.0                               | 3.37(7)                         |
| 3.0         |       | 5.17(6)                           |                                 |
| 4.0         |       | 6.85(7)                           |                                 |
| 5.0         |       | 8.83(8)                           |                                 |
| Second step | 288.3 | 1.5                               | 0.020(8)                        |
|             |       | 2.0                               | 0.027(7)                        |
|             |       | 3.0                               | 0.034(7)                        |
|             |       | 4.0                               | 0.046(8)                        |
|             |       | 5.0                               | 0.056(7)                        |
|             | 298.0 | 1.5                               | 0.027(8)                        |
|             |       | 2.0                               | 0.039(7)                        |
|             |       | 3.0                               | 0.049(7)                        |
|             |       | 4.0                               | 0.063(8)                        |
|             |       | 5.0                               | 0.078(8)                        |
|             | 308.0 | 1.5                               | 0.038(7)                        |
|             |       | 2.0                               | 0.046(6)                        |
|             |       | 3.0                               | 0.065(6)                        |
|             |       | 4.0                               | 0.082(6)                        |
|             |       | 5.0                               | 0.101(8)                        |

**Table S11** Observed *pseudo*-first order rate constants as a function of ligand concentration for the reaction between  $[\text{Pd}(\text{dach})(N,O\text{-gly})]^+$  and 5'-IMP in 25 mM Hepes, pH = 7.2,  $\lambda = 320$  nm.

|             | T/K   | $10^{-3} C_{5'\text{-IMP}}/\text{M}$ | $k_{\text{obsd}}/\text{s}^{-1}$ |
|-------------|-------|--------------------------------------|---------------------------------|
| First step  | 298.3 | 1.0                                  | 0.98(7)                         |
|             |       | 1.5                                  | 1.43(7)                         |
|             |       | 2.0                                  | 1.88(7)                         |
|             |       | 3.0                                  | 2.76(6)                         |
|             |       | 4.0                                  | 3.36(7)                         |
|             |       | 5.0                                  | 4.00(8)                         |
| Second step | 298.3 | 1.5                                  | 0.041(7)                        |
|             |       | 2.0                                  | 0.047(6)                        |
|             |       | 3.0                                  | 0.057(6)                        |
|             |       | 4.0                                  | 0.065(7)                        |
|             |       | 5.0                                  | 0.070(7)                        |

**Table S12** Observed *pseudo*-first order rate constants as a function of ligand concentration for the reaction between  $[\text{Pd}(\text{dach})(N,O\text{-gly})]^+$  and 5'-GMP in 25 mM Hepes, pH = 7.2,  $\lambda = 318$  nm.

|             | T/K   | $10^{-3} C_{5'\text{-GMP}}/\text{M}$ | $k_{\text{obsd}}/\text{s}^{-1}$ |
|-------------|-------|--------------------------------------|---------------------------------|
| First step  | 298.3 | 1.0                                  | 0.99(8)                         |
|             |       | 1.5                                  | 1.58(7)                         |
|             |       | 2.0                                  | 2.04(6)                         |
|             |       | 3.0                                  | 2.83(6)                         |
|             |       | 4.0                                  | 3.62(7)                         |
|             |       | 5.0                                  | 4.22(7)                         |
| Second step | 298.3 | 1.5                                  | 0.042(7)                        |
|             |       | 2.0                                  | 0.046(6)                        |
|             |       | 3.0                                  | 0.060(6)                        |
|             |       | 4.0                                  | 0.068(6)                        |
|             |       | 5.0                                  | 0.078(7)                        |

**Table S13** Observed *pseudo*-first order rate constants as a function of ligand concentration for the reaction between  $[\text{Pd}(\text{dach})(N,S\text{-met})]^+$  and inosine in 25 mM Hepes, pH = 7.2,  $\lambda = 315$  nm.

|             | T/K   | $10^{-3} C_{\text{Ino}}/\text{M}$ | $k_{\text{obsd}}/\text{s}^{-1}$ |
|-------------|-------|-----------------------------------|---------------------------------|
| First step  | 298.0 | 1.0                               | 0.018(7)                        |
|             |       | 1.5                               | 0.028(7)                        |
|             |       | 2.0                               | 0.038(6)                        |
|             |       | 3.0                               | 0.052(7)                        |
|             |       | 4.0                               | 0.072(6)                        |
|             |       | 5.0                               | 0.090(8)                        |
| Second step | 298.0 | 1.5                               | 0.00019(7)                      |
|             |       | 2.0                               | 0.00025(6)                      |
|             |       | 3.0                               | 0.00038(6)                      |
|             |       | 4.0                               | 0.00052(6)                      |
|             |       | 5.0                               | 0.00063(8)                      |

**Table S14** Observed *pseudo*-first order rate constants as a function of ligand concentration for the reaction between  $[\text{Pd}(\text{dach})(N,S\text{-met})]^+$  and 5'-IMP in 25 mM Hepes, pH = 7.2,  $\lambda = 328$  nm.

|             | T/K   | $10^{-3} C_{5'\text{-IMP}}/\text{M}$ | $k_{\text{obsd}}/\text{s}^{-1}$ |
|-------------|-------|--------------------------------------|---------------------------------|
| First step  | 298.0 | 1.0                                  | 0.016(7)                        |
|             |       | 1.5                                  | 0.020(7)                        |
|             |       | 2.0                                  | 0.022(6)                        |
|             |       | 3.0                                  | 0.032(7)                        |
|             |       | 4.0                                  | 0.043(8)                        |
|             |       | 5.0                                  | 0.050(7)                        |
| Second step | 298.0 | 1.5                                  | 0.00023(7)                      |
|             |       | 2.0                                  | 0.00027(5)                      |
|             |       | 3.0                                  | 0.00034(6)                      |
|             |       | 4.0                                  | 0.00039(7)                      |
|             |       | 5.0                                  | 0.00044(7)                      |

**Table S15** Observed *pseudo*-first order rate constants as a function of ligand concentration for the reaction between  $[\text{Pd}(\text{dach})(N,S\text{-met})]^+$  and 5'-GMP in 25 mM Hepes, pH = 7.2,  $\lambda = 330$  nm.

|             | T/K   | $10^{-3} C_{5'\text{-GMP}}/\text{M}$ | $k_{\text{obsd}}/\text{s}^{-1}$ |
|-------------|-------|--------------------------------------|---------------------------------|
| First step  | 298.0 | 1.0                                  | 0.016(7)                        |
|             |       | 1.5                                  | 0.020(7)                        |
|             |       | 2.0                                  | 0.027(7)                        |
|             |       | 3.0                                  | 0.034(6)                        |
|             |       | 4.0                                  | 0.044(6)                        |
|             |       | 5.0                                  | 0.056(7)                        |
| Second step | 298.0 | 1.5                                  | 0.00023(7)                      |
|             |       | 2.0                                  | 0.00028(6)                      |
|             |       | 3.0                                  | 0.00034(6)                      |
|             |       | 4.0                                  | 0.00041(6)                      |
|             |       | 5.0                                  | 0.00049(7)                      |

**Table S16** Observed *pseudo*-first order rate constants as a function of ligand concentration for the reaction between [Pd(dach)Cl<sub>2</sub>] and inosine in 25 mM Hepes, pH = 7.2, λ = 310 nm.

|             | T/K   | 10 <sup>-3</sup> C <sub>Ino</sub> /M | k <sub>obsd</sub> /s <sup>-1</sup> |
|-------------|-------|--------------------------------------|------------------------------------|
| First step  | 298.0 | 1.0                                  | 1.42(8)                            |
|             |       | 1.5                                  | 1.91(7)                            |
|             |       | 2.0                                  | 2.64(7)                            |
|             |       | 3.0                                  | 4.15(7)                            |
|             |       | 4.0                                  | 5.64(6)                            |
|             |       | 5.0                                  | 6.58(7)                            |
| Second step | 298.0 | 1.5                                  | 0.023(7)                           |
|             |       | 2.0                                  | 0.031(6)                           |
|             |       | 3.0                                  | 0.041(7)                           |
|             |       | 4.0                                  | 0.058(6)                           |
|             |       | 5.0                                  | 0.076(7)                           |



**Table S17** Observed *pseudo*-first order rate constants as a function of ligand concentration for the reaction between [Pd(dach)Cl<sub>2</sub>] and 5'-IMP in 25 mM Hepes, pH = 7.2, λ = 335 nm.

|             | T/K   | 10 <sup>-3</sup> C <sub>5'-IMP</sub> /M | k <sub>obsd</sub> /s <sup>-1</sup> |
|-------------|-------|-----------------------------------------|------------------------------------|
| First step  | 298.0 | 1.0                                     | 1.22(7)                            |
|             |       | 1.5                                     | 1.69(7)                            |
|             |       | 2.0                                     | 2.14(6)                            |
|             |       | 3.0                                     | 2.75(6)                            |
|             |       | 4.0                                     | 3.26(6)                            |
|             |       | 5.0                                     | 3.96(7)                            |
| Second step | 298.0 | 1.5                                     | 0.015(7)                           |
|             |       | 2.0                                     | 0.020(6)                           |
|             |       | 3.0                                     | 0.027(6)                           |
|             |       | 4.0                                     | 0.040(6)                           |
|             |       | 5.0                                     | 0.048(6)                           |

**Table S18** Observed *pseudo*-first order rate constants as a function of ligand concentration for the reaction between [Pd(dach)Cl<sub>2</sub>] and 5'-GMP in 25 mM Hepes, pH = 7.2, λ = 330 nm.

|             | T/K   | 10 <sup>-3</sup> C <sub>5'-GMP</sub> /M | k <sub>obsd</sub> /s <sup>-1</sup> |
|-------------|-------|-----------------------------------------|------------------------------------|
| First step  | 298.0 | 1.0                                     | 1.41(8)                            |
|             |       | 1.5                                     | 1.72(7)                            |
|             |       | 2.0                                     | 2.11(6)                            |
|             |       | 3.0                                     | 2.87(7)                            |
|             |       | 4.0                                     | 3.43(7)                            |
|             |       | 5.0                                     | 4.31(7)                            |
| Second step | 298.0 | 1.5                                     | 0.017(7)                           |
|             |       | 2.0                                     | 0.022(6)                           |
|             |       | 3.0                                     | 0.030(6)                           |
|             |       | 4.0                                     | 0.043(6)                           |
|             |       | 5.0                                     | 0.052(7)                           |

**Table S19** Observed *pseudo*-first order rate constants as a function of pressure for the reaction between  $[\text{Pd}(\text{dach})(\text{H}_2\text{O})_2]^{2+}$  and inosine (2 mM) in 0.10 M  $\text{NaClO}_4$ , pH = 2.5. The first reaction step.

| T/K   | P/MPa | $k_{\text{obsd}}/\text{s}^{-1}$ |
|-------|-------|---------------------------------|
| 283.1 | 10    | 1.984(5)                        |
|       | 50    | 2.060(4)                        |
|       | 90    | 2.290(5)                        |
|       | 130   | 2.410(4)                        |

First Step

Second step

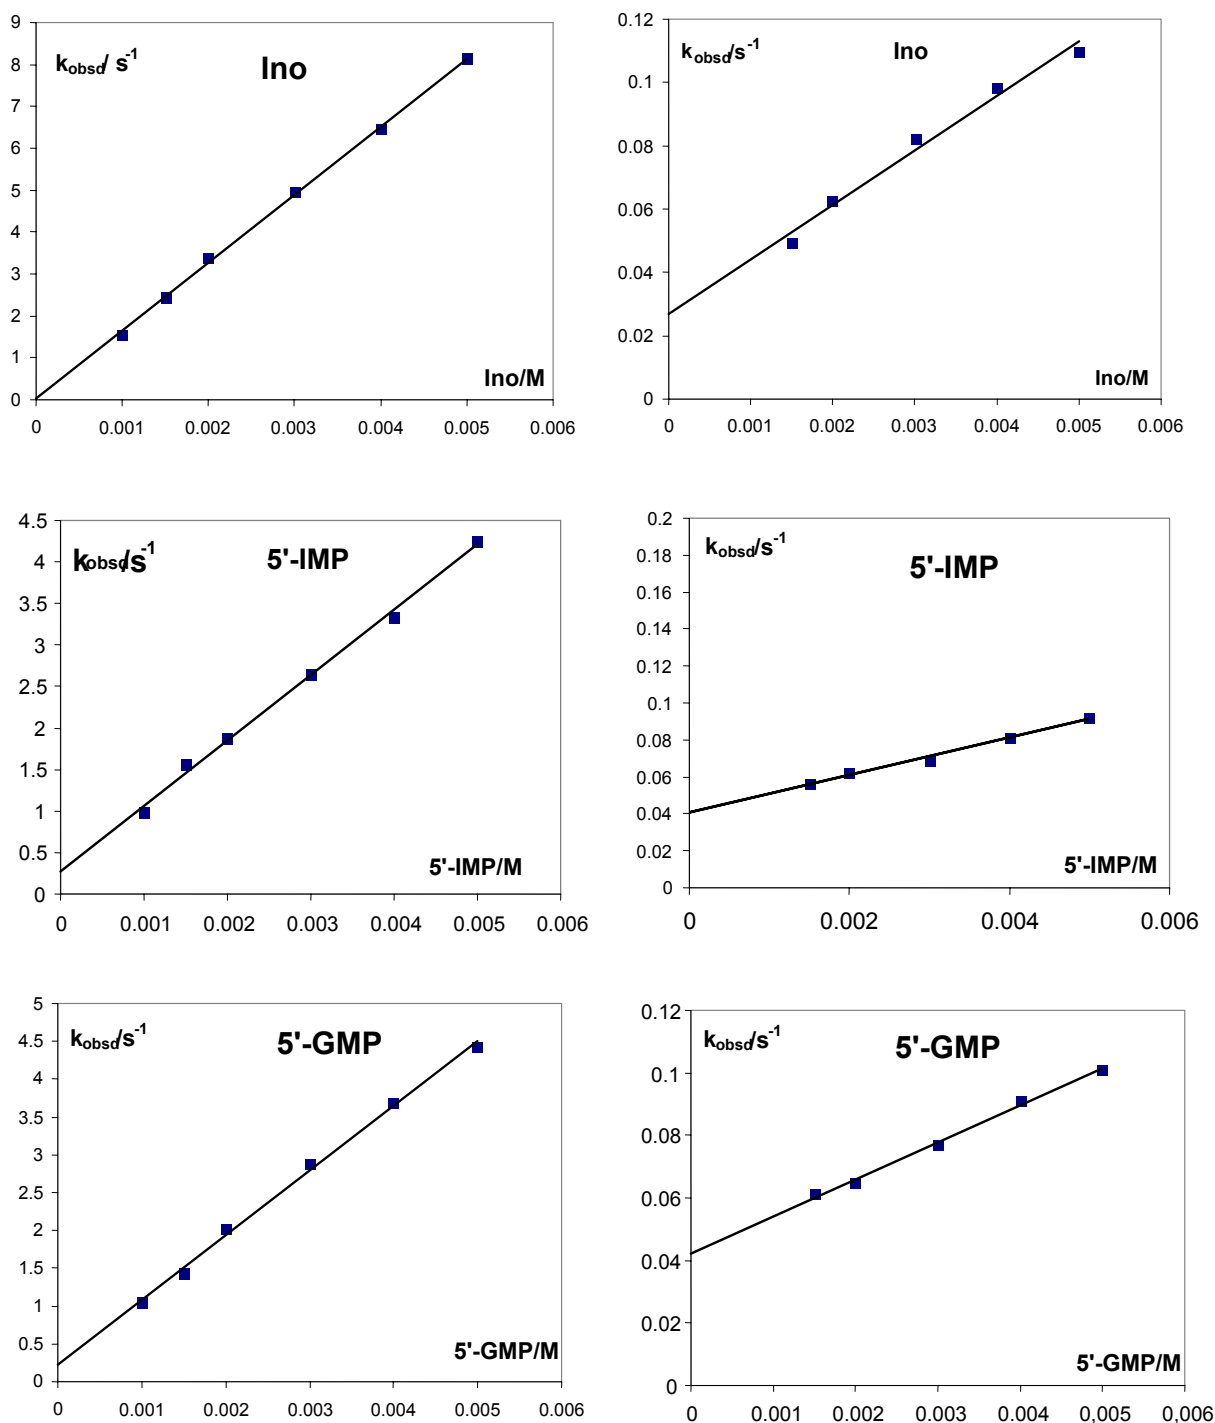

**Fig. S1** Pseudo-first order rate constants as a function of nucleophile concentration for the first and second steps of the substitution reactions of  $[Pd(dach)(O,O-ox)]$  at pH = 7.2, 25 mM Hepes, T = 298 K.

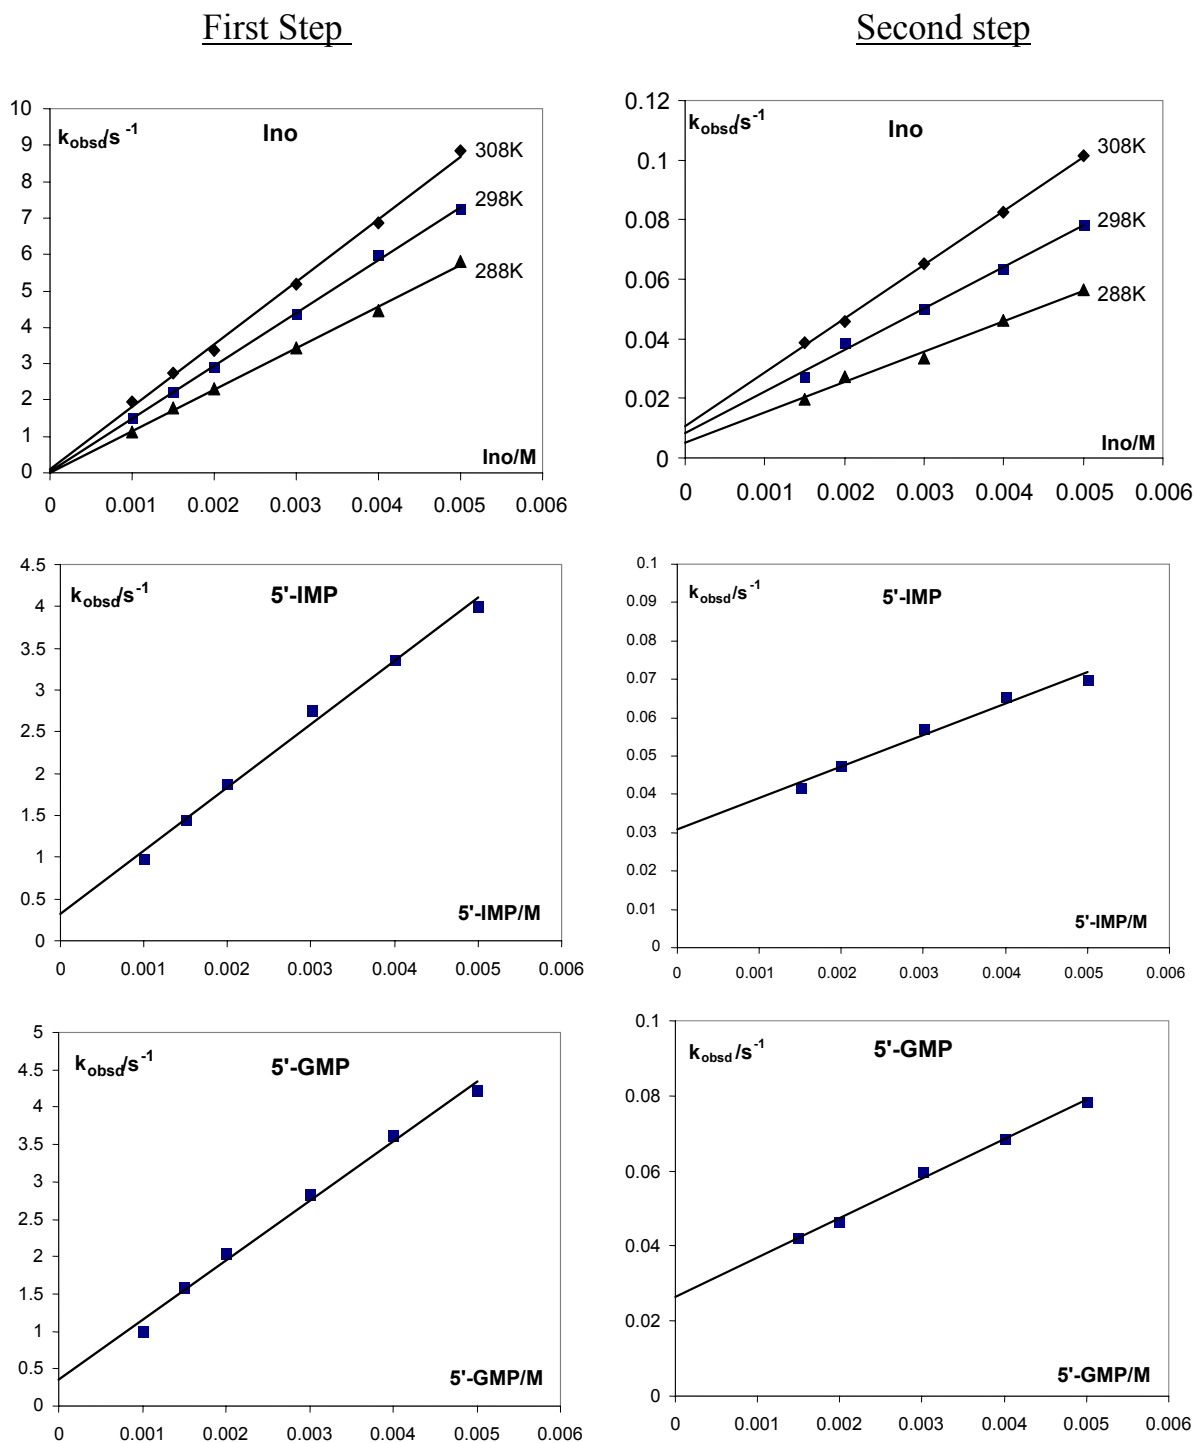

**Fig. S2** Pseudo-first order rate constants as a function of nucleophile concentration for the first and second step of the substitution reaction of  $[\text{Pd}(\text{dach})(N,O\text{-gly})]^+$  at pH = 7.2, 25 mM Hepes, T = 298 K

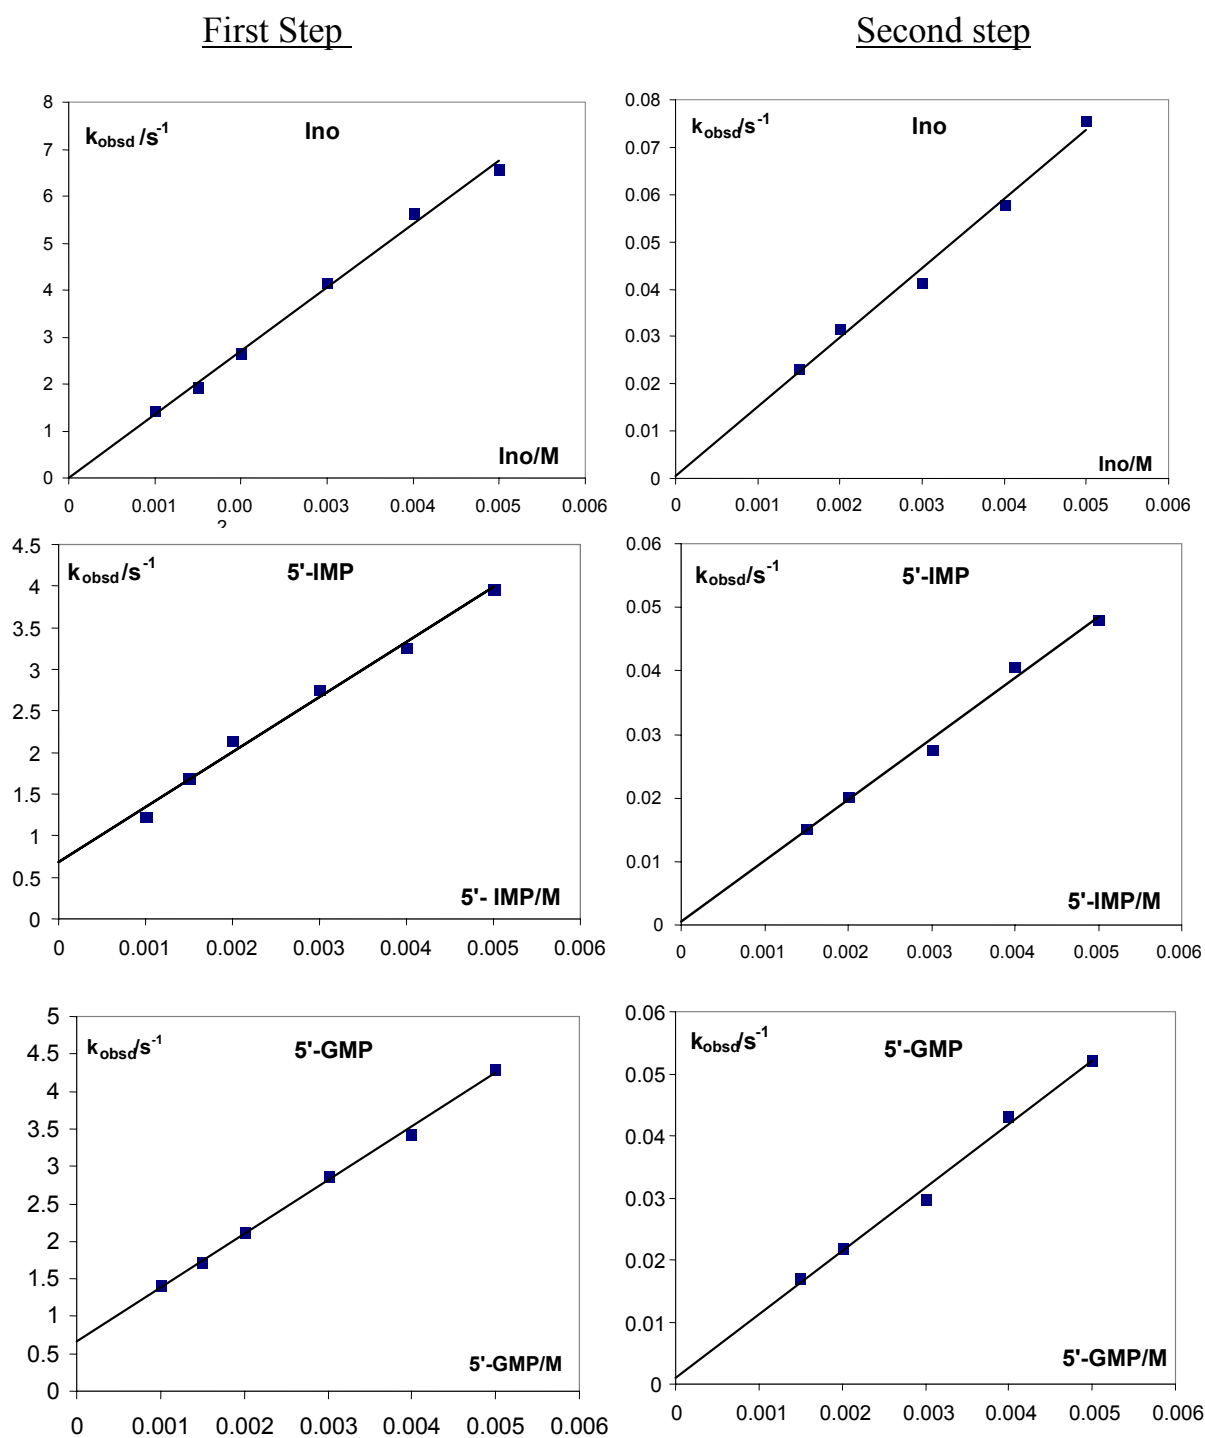

**Fig. S3** Pseudo-first order rate constants as a function of nucleophile concentration for the first and second steps of the substitution reactions of  $[\text{Pd}(\text{dach})\text{Cl}_2]$  at  $\text{pH} = 7.2$ , 25 mM Hepes,  $T = 298 \text{ K}$ .

First Step

Second step

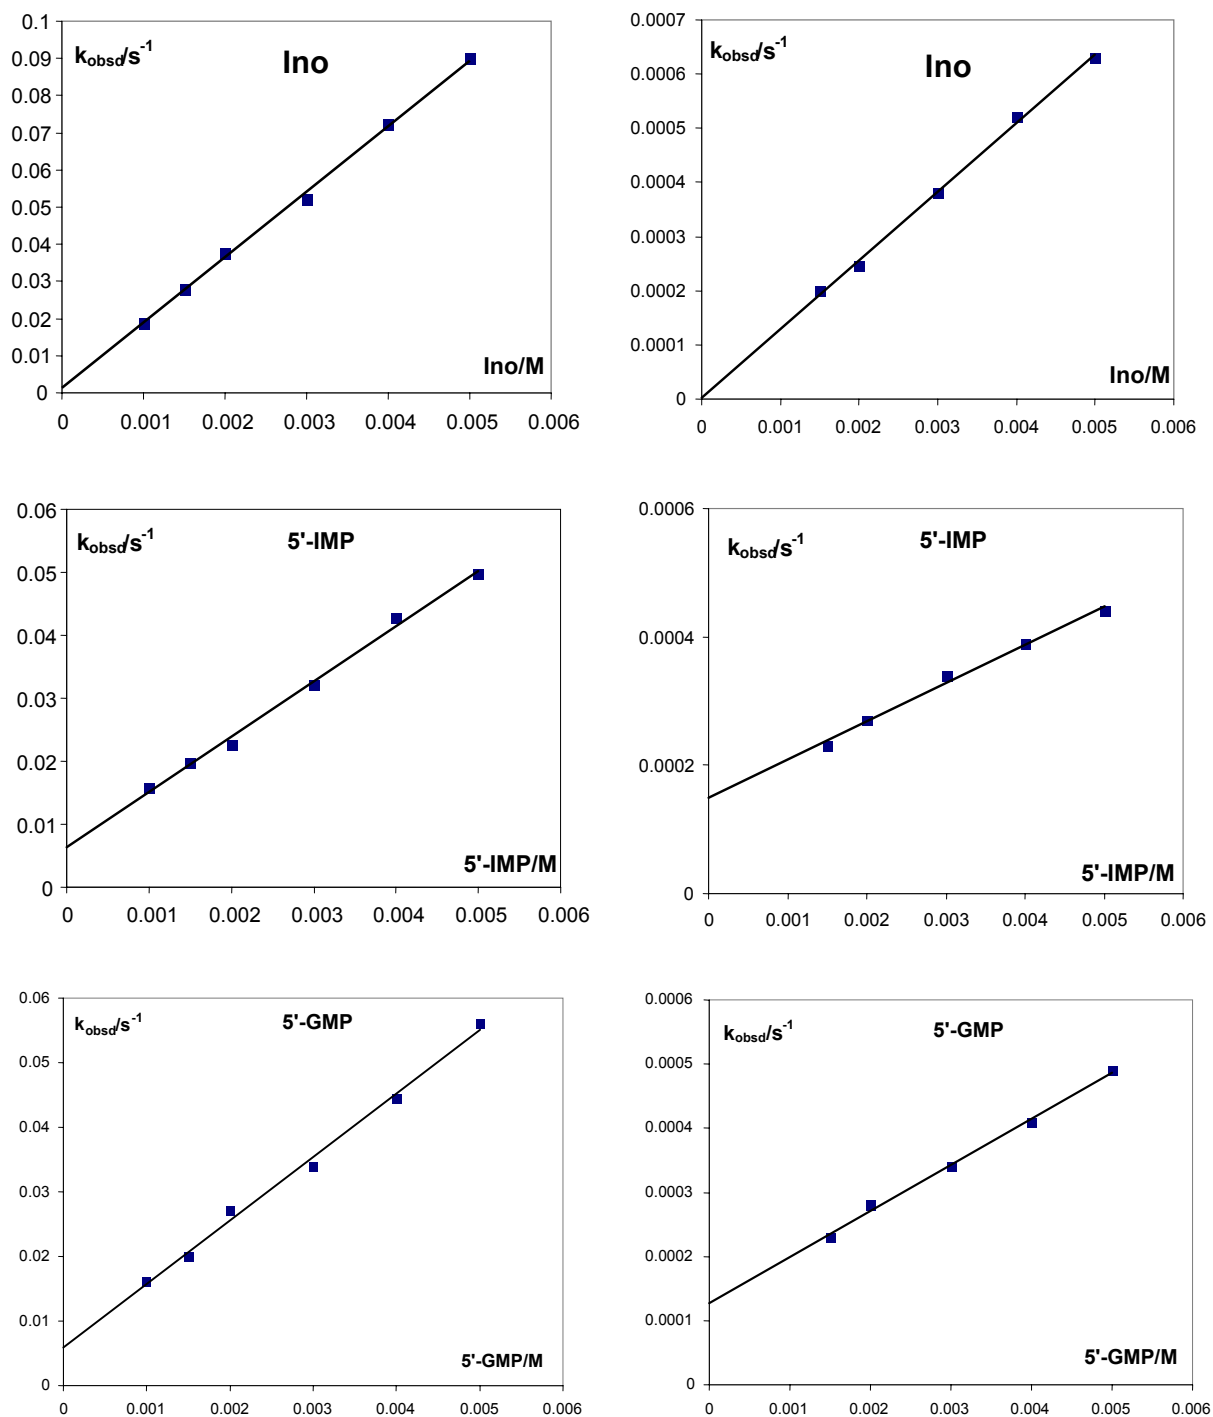

**Fig. S4** Pseudo-first order rate constants as a function of nucleophile concentration for the first and second steps of the substitution reactions of  $[\text{Pd}(\text{dach})(N,S\text{-met})]^+$  at  $\text{pH} = 7.2$ , 25 mM Heps,  $T = 298 \text{ K}$
